# Supplementary material for: Efficacy and safety of ustekinumab in Japanese patients with moderately to severely active Crohn's disease: a subpopulation analysis of phase 3 induction and maintenance studies
Source: PubMed Central journal article supplement — Intest Res. 2017 Oct 23;15(4):475–86. doi: 10.5217/ir.2017.15.4.475 (PMC5683978; doi:10.5217/ir.2017.15.4.475), 2017-10-23
Supplement: ir-15-475-s001.pdf [file ir-15-475-s001.pdf]

See "Efficacy and safety of ustekinumab in Japanese patients with moderately to severely active Crohn's disease: a subpopulation analysis of phase 3 induction and maintenance studies" on page 475-486.

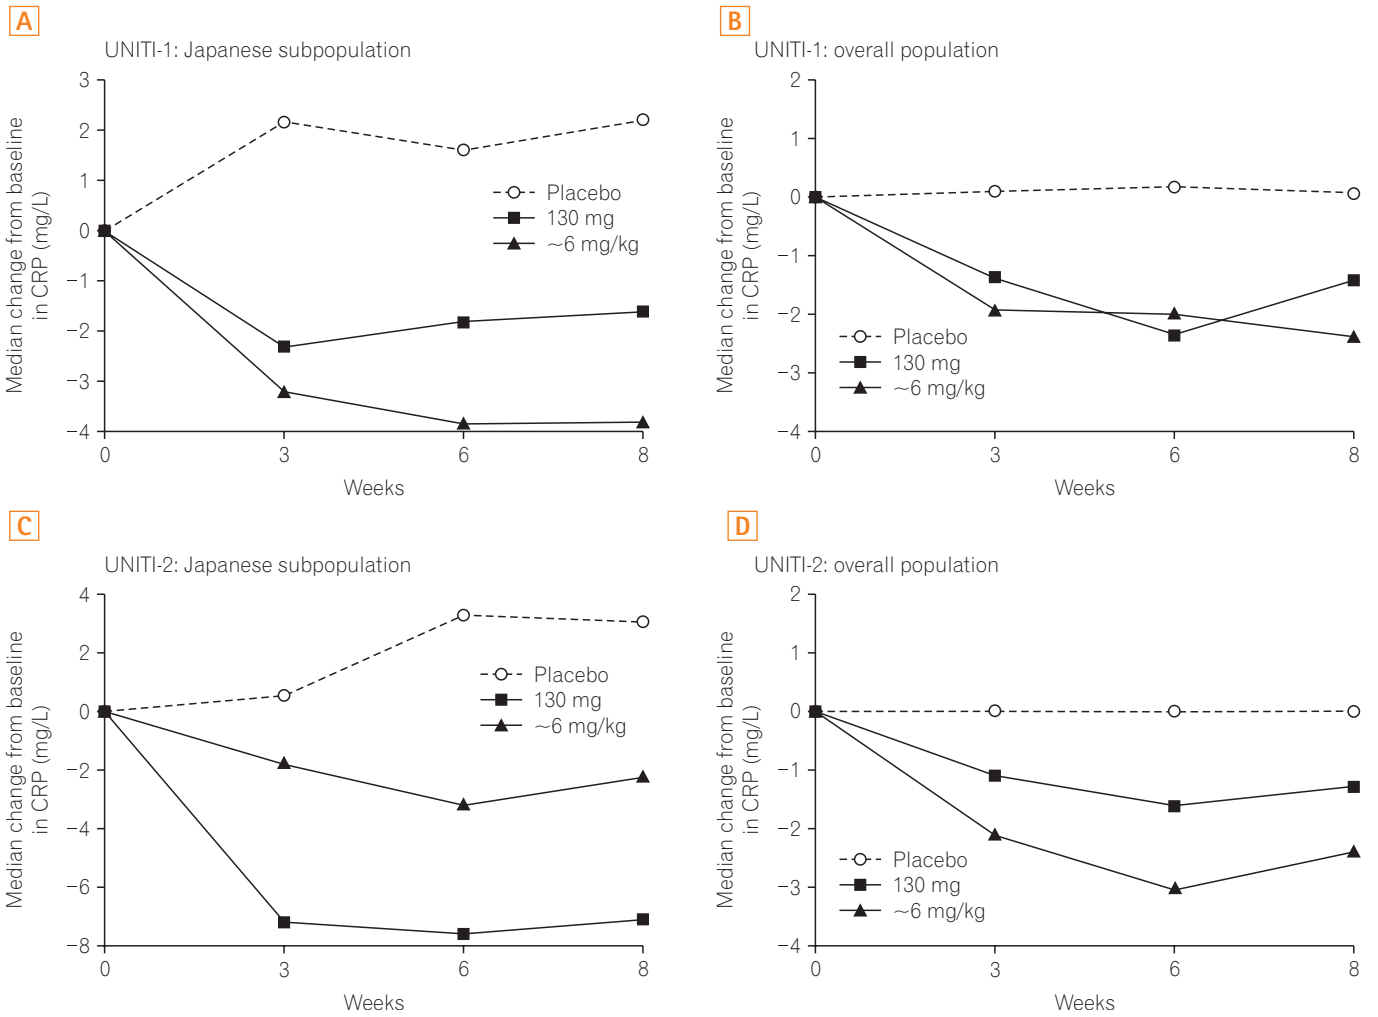

**Supplementary Fig. 1.** Change in CRP concentration through week 8 of induction studies. Panel B and D are adapted from Feagan BG, et al. *N Engl J Med* 2016;375:1946-1960, with permission Massachusetts Medical Society.<sup>19</sup>
