# Supplementary material for: Efficacy and safety of ustekinumab in Japanese patients with moderately to severely active Crohn's disease: a subpopulation analysis of phase 3 induction and maintenance studies
Source: PubMed Central journal article supplement — Intest Res. 2017 Oct 23;15(4):475–86. doi: 10.5217/ir.2017.15.4.475 (PMC5683978; doi:10.5217/ir.2017.15.4.475), 2017-10-23
Supplement: ir-15-475-s003.pdf [file ir-15-475-s003.pdf]

See "Efficacy and safety of ustekinumab in Japanese patients with moderately to severely active Crohn's disease: a subpopulation analysis of phase 3 induction and maintenance studies" on page 475-486.

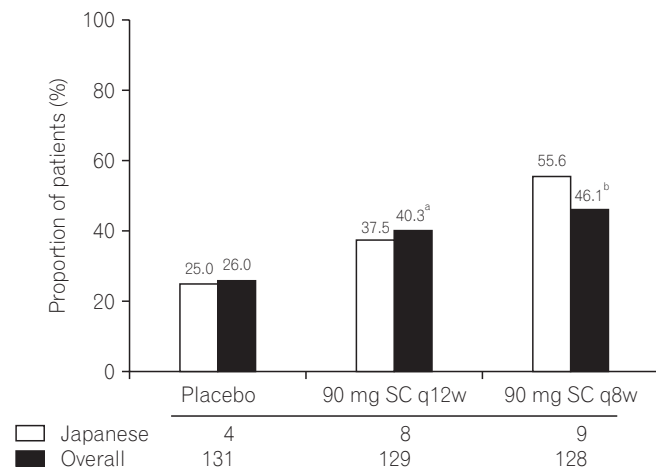

**Supplementary Fig. 3.** Sustained clinical remission at weeks 36, 40, and 44 of the maintenance study. <sup>a</sup> $P=0.023$  vs. placebo; <sup>b</sup> $P<0.001$  vs. placebo. q12w, every 12 weeks; q8w, every 8 weeks.
